# Supplementary material for: The many layers of BOLD. The effect of hypercapnic and hyperoxic stimuli on macro- and micro-vascular compartments quantified by CVR, M, and CBV across cortical depth
Source: PubMed Central journal article supplement (PMC9941862; doi:10.1177/0271678x221133972), 2022-10-19
Supplement: sj-pdf-1-jcb-10.1177_0271678X221133972.pdf [file sj-pdf-1-jcb-10.1177_0271678X221133972.pdf]

|              | +3 mmHg CO <sub>2</sub> |     | +5 mmHg CO <sub>2</sub> |     | +8 mmHg CO <sub>2</sub> |     | +10 mmHg CO <sub>2</sub> |      | +350 mmHg O <sub>2</sub> |       |
|--------------|-------------------------|-----|-------------------------|-----|-------------------------|-----|--------------------------|------|--------------------------|-------|
|              | GE                      | SE  | GE                      | SE  | GE                      | SE  | GE                       | SE   | GE                       | SE    |
| <b>Sub01</b> | .                       | .   | 3.8                     | 4.1 | .                       | .   | 8.4                      | 8.0  | 374.6                    | 373.4 |
| <b>Sub02</b> | .                       | .   | 2.7                     | 2.2 | .                       | .   | 7.4                      | 7.7  | 369.0                    | 366.8 |
| <b>Sub03</b> | .                       | .   | 4.4                     | 4.2 | .                       | .   | 7.4                      | 7.9  | 349.3                    | 332.3 |
| <b>Sub04</b> | 2.7                     | .   | 5.1                     | 5.2 | 5.5                     | .   | 9.0                      | 8.4  | 276.4                    | 294.1 |
| <b>Sub05</b> | .                       | 3.3 | 5.7                     | 4.9 | .                       | 7.3 | 10.3                     | 9.4  | 324.0                    | 318.8 |
| <b>Sub06</b> | .                       | .   | 4.5                     | 4.9 | .                       | .   | 8.7                      | 8.4  | 358.3                    | 342.1 |
| <b>Sub07</b> | .                       | 3.6 | 5.8                     | 5.1 | .                       | 6.8 | 8.9                      | 8.1  | 357.4                    | 334.7 |
| <b>Sub08</b> | 4.1                     | 3.9 | 6.3                     | 6.2 | 8.2                     | 8.0 | 10.2                     | 10.3 | 345.1                    | 332.2 |
| <b>Sub09</b> | 3.7                     | 3.7 | 5.8                     | 5.7 | 7.2                     | 7.4 | 10.0                     | 9.5  | 368.7                    | 362.6 |
| <b>Sub10</b> | 3.7                     | 3.4 | 5.0                     | 5.3 | 7.2                     | 7.0 | 8.5                      | 8.7  | 309.4                    | 316.7 |
| <b>Sub11</b> | 2.8                     | 2.5 | 4.3                     | 4.3 | 6.1                     | 6.0 | 7.8                      | 8.0  | 273.3                    | 278.3 |

**TABLE CAPTION**

**Supplementary material I. Average obtained PetCO<sub>2</sub> and PetO<sub>2</sub> values.** For each of the 4 targeted PetCO<sub>2</sub> values (+3, +5, +8, +10 mmHg PetCO<sub>2</sub>), during GE and SE BOLD acquisition, the average obtained PetCO<sub>2</sub> values are shown (columns) for each participant (rows). The last 2 columns show the average obtained PetO<sub>2</sub> values for each participant.
