# Supplementary material for: The many layers of BOLD. The effect of hypercapnic and hyperoxic stimuli on macro- and micro-vascular compartments quantified by CVR, M, and CBV across cortical depth
Source: PubMed Central journal article supplement (PMC9941862; doi:10.1177/0271678x221133972), 2022-10-19
Supplement: sj-pdf-2-jcb-10.1177_0271678X221133972.pdf [file sj-pdf-2-jcb-10.1177_0271678X221133972.pdf]

The venous deoxygenated fraction of [Hb] is calculated as described by Chiarelli et al. (2009)<sup>46</sup>, using the Severinghaus equation<sup>52</sup>:

$$Sa_{O_2} = \frac{1}{\left( \frac{23400}{(Pa_{O_2})^3 + 150(Pa_{O_2})} + 1 \right)} \quad (1)$$

, where the measured  $PetO_2$  values can be used for the  $Pa_{O_2}$  parameter. Next, the arterial oxygen content ( $Ca_{O_2}$ ) can be estimated by assuming literature standard values for: the  $O_2$ -carrying capacity of hemoglobin ( $\varphi$ : 1.34 ml  $O_2$  / g<sub>hb</sub> in humans), the concentration of hemoglobin ([Hb]: 15 g Hb / dl blood), and the solubility coefficient of oxygen in blood ( $\varepsilon$ : 0.0031 ml  $O_2$  / (dl blood \* mmHg)):

$$Ca_{O_2} = (\varphi \cdot [Hb] \cdot Sa_{O_2}) + (Pa_{O_2} \cdot \varepsilon) \quad (2)$$

The venous oxygen content ( $Cv_{O_2}$ ) depends on the  $Ca_{O_2}$  and the OEF:

$$Cv_{O_2} = Ca_{O_2} - (Ca_{O_2}|_0 \cdot OEF) \quad (3)$$

In equation (3), we assume a baseline OEF = 0.3<sup>46,51</sup>. The fractional venous oxygen saturation ( $Sv_{O_2}$ ) can then be estimated as follows:

$$Sv_{O_2} = \frac{Cv_{O_2} - (Pv_{O_2} \cdot \varepsilon)}{\varphi \cdot [Hb]} \quad (4)$$

In equation (4), the  $Pv_{O_2}$  represents the oxygen dissolved in venous plasma and is believed to have a negligible small effect<sup>46</sup> (i.e.,  $Pv_{O_2} \approx 0$ ). At this point, we can estimate the deoxygenated fraction of [Hb] ( $F_{[dHb]}$ ) from  $Sv_{O_2}$ :

$$F_{[dHb]} = 1 - Sv_{O_2} \quad (5)$$

## SUPPLEMENTARY TEXT CAPTION

### Supplementary material II. Fractional [dHb] calculation.
